# Supplementary material for: Novel nanomagnetite doped sugarcane bagasse biochar biocomposite for efficient removal of toxic heavy metal ions from wastewater
Source: Royal Society of Chemistry journal article supplement (doi:10.1039/d6ra03304k), 2026-05-19
Supplement: d6ra03304k1.pdf [file d6ra03304k1.pdf]

## Supplementary data

### Novel nanomagnetite doped sugarcane bagasse biochar biocomposite for efficient removal of toxic heavy metal ions from wastewater

Magda A Akl<sup>1\*</sup>, Aya G Mostafa<sup>1</sup> and Asmaa A Serage<sup>1</sup>

<sup>1</sup>Department of Chemistry, Faculty of Science, Mansoura University, Mansoura 35516, Egypt

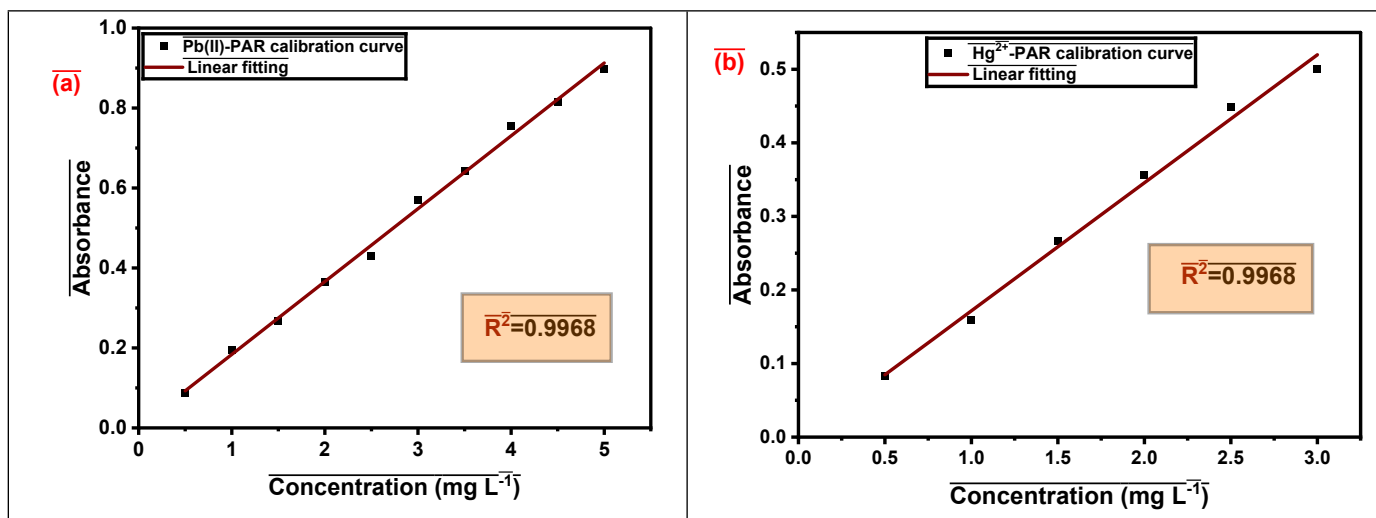

Fig. S1. Calibration curve of (a) Pb<sup>2+</sup> and (b) Hg<sup>2+</sup> with PAR reagent.
